# Supplementary material for: Department Wide Validation in Digital Pathology—Experience from an Academic Teaching Hospital Using the UK Royal College of Pathologists’ Guidance
Source: MDPI journal article supplement (doi:10.3390/diagnostics13132144), 2023-06-22

Supplementary material

Table S1: Specialities of the histopathologists pathologists in this study.

Key: Urology Germ cell (UGC), Bladder/Kidney/Penile (BKP), Gastrointestinal (GI), Head & Neck (H&N). Renal is medical renal biopsies.

| Pathologist | Specialities |             |          |
|-------------|--------------|-------------|----------|
| 1           | UGC          | BKP         |          |
| 2           | UGC          | BKP         | Prostate |
| 3           | UGC          | BKP         | Prostate |
| 4           | Prostate     |             |          |
| 5           | BKP          | Breast      |          |
| 6           | Breast       |             |          |
| 7           | Breast       |             |          |
| 8           | Renal        |             |          |
| 9           | Renal        |             |          |
| 10          | GI           | Liver       |          |
| 11          | GI           |             |          |
| 12          | GI           |             |          |
| 13          | GI           |             |          |
| 14          | GI           |             |          |
| 15          | H&N          |             |          |
| 16          | Skin         |             |          |
| 17          | Skin         |             |          |
| 18          | Skin         |             |          |
| 19          | Gynaecology  | Respiratory |          |
| 20          | Gynaecology  |             |          |

Table S2: Technical issues encountered.

|                                              |                                                                                                                                                                                                                                                                                                                                                                                                                                                                                                                                                                                                                                       |
|----------------------------------------------|---------------------------------------------------------------------------------------------------------------------------------------------------------------------------------------------------------------------------------------------------------------------------------------------------------------------------------------------------------------------------------------------------------------------------------------------------------------------------------------------------------------------------------------------------------------------------------------------------------------------------------------|
| Scanning related issues                      |                                                                                                                                                                                                                                                                                                                                                                                                                                                                                                                                                                                                                                       |
| Time waiting for slides to be scanned        | <ul style="list-style-type: none"><li>○ Prolonged scanning times for larger sections.</li><li>○ Rescanning poor quality slides.</li></ul>                                                                                                                                                                                                                                                                                                                                                                                                                                                                                             |
| Slides in the wrong order                    | <ul style="list-style-type: none"><li>○ Slides scanned out of order they were embedded.</li></ul>                                                                                                                                                                                                                                                                                                                                                                                                                                                                                                                                     |
| Tissue not scanned / scanned in multiple     | <ul style="list-style-type: none"><li>○ Not all levels scanned.</li><li>○ Tissue out of the field of scanning.</li><li>○ Glass slide broke in lab couldn't be scanned.</li><li>○ Same slides in a case scanned more than once.</li></ul>                                                                                                                                                                                                                                                                                                                                                                                              |
| Quality of scans                             | <ul style="list-style-type: none"><li>○ Areas out of focus e.g. due to minor tissue folds, tissue at edge of coverslip, wax obscuring view</li><li>○ Fatty tissue or mucous too faint, scans feel 'empty'.</li><li>○ Staining quality: slides were pale (issue for both GS &amp; WSI, overcome with colour adjustment on WSI).</li><li>○ Poor detail on delicate collagen features.</li><li>○ Certain features require high quality scanning e.g. mitotic figures, intraepithelial lymphocytosis (GI), so had to be rescanned if poor quality.</li><li>○ Distortion of artefacts magnified on digital e.g. drying artefact.</li></ul> |
| Portal related issues                        |                                                                                                                                                                                                                                                                                                                                                                                                                                                                                                                                                                                                                                       |
|                                              | <ul style="list-style-type: none"><li>○ Portal running slowly, especially for larger images and during network peak use times.</li><li>○ Pathologist was 'logged in and out of the portal'.</li><li>○ Reporting tab doesn't always save pathologist's notes.</li><li>○ No clinical details available on portal.</li></ul>                                                                                                                                                                                                                                                                                                             |
| Virtual private network (VPN) related issues |                                                                                                                                                                                                                                                                                                                                                                                                                                                                                                                                                                                                                                       |
|                                              | <ul style="list-style-type: none"><li>○ 'Virtual desktop program degrades image quality and can be very slow'.</li><li>○ Trust's virtual private network (VPN) access allows image quality but variable connections.</li></ul>                                                                                                                                                                                                                                                                                                                                                                                                        |

Table S3: Areas of potential pitfalls with the digital platform by speciality

| Speciality            | Potential pitfalls                                                                                                                                | Frequency of comments        |
|-----------------------|---------------------------------------------------------------------------------------------------------------------------------------------------|------------------------------|
| General               | Interpretation of special stains in suspected infection                                                                                           | 20 (renal, GI, liver)        |
|                       | Differentiating reactive atypia from dysplasia in an inflammatory background                                                                      | 17 (BKP, breast)             |
|                       | Identification of mitoses                                                                                                                         | 15 (breast, GI, liver)       |
|                       | Assessment of dysplasia (tendency to overcall low grade)                                                                                          | 9 (BKP, breast, GI)          |
|                       | Identification of necrosis                                                                                                                        | 6 (BKP, renal, liver, gynae) |
|                       | Identification of perineural invasion                                                                                                             | 3 (prostate, skin)           |
|                       | Identification of inflammatory cells such as neutrophils and plasma cells, especially if crushed                                                  | 3 (UGC, prostate, BKP)       |
|                       | Identification of lymph nodes, especially in fat                                                                                                  | 3 (prostate, breast)         |
|                       | Assessment of lymphovascular invasion                                                                                                             | 2 (UGC)                      |
|                       | Identification of subtle amyloid deposits                                                                                                         | 1 (renal)                    |
| Urology Germ Cell     | Identification of spermatogonia                                                                                                                   | 10                           |
|                       | Identification of germ cell neoplasia in situ (GCNIS)                                                                                             | 2                            |
|                       | Identification of rete testis invasion                                                                                                            | 2                            |
|                       | Differentiating seminoma vs solid pattern embryonal carcinoma                                                                                     | 1                            |
| Prostate              | Identification of prostatic intraepithelial neoplasia (PIN)                                                                                       | 4                            |
|                       | Identification of atypical small acinar proliferation (ASAP)                                                                                      | 3                            |
|                       | Identification of lymph node micrometastasis                                                                                                      | 1                            |
|                       | Identification of extra prostatic extension                                                                                                       | 1                            |
| Bladder/kidney/penile | Grading of dysplasia in urothelial carcinoma when at low grade / high grade borderline                                                            | 13                           |
|                       | Identification of flat carcinoma in situ                                                                                                          | 1                            |
|                       | Identification of foreign material                                                                                                                | 1                            |
| Breast                | Interpretation of immunohistochemistry (as it is positivity amplified digitally) particularly interpretation of Her 2 at borderline between 1+/2+ | 16                           |

|             |                                                                                                                                 |   |
|-------------|---------------------------------------------------------------------------------------------------------------------------------|---|
|             | Assessment of pleomorphism                                                                                                      | 1 |
|             | Identification of intraductal proliferations e.g. atypical ductal hyperplasia                                                   | 1 |
|             | Identification of calcium oxalate                                                                                               | 1 |
|             | Identification of small mucinous tumour                                                                                         | 1 |
| Renal       | Immunofluorescence not available digitally                                                                                      | 5 |
|             | Identification of spikes and lucencies on silver stain                                                                          | 5 |
|             | Identification of glomerular tip lesions                                                                                        | 1 |
|             | Identification of basement membrane abnormalities                                                                               | 1 |
| GI          | Identification of paneth metaplasia                                                                                             | 2 |
|             | Identification of helicobacter pylori identification on Tol blue stain                                                          | 1 |
|             | Grading severity of inflammatory bowel disease                                                                                  | 1 |
|             | Interpretation of special stains e.g. EVG                                                                                       | 1 |
|             | Identification of intestinal metaplasia                                                                                         | 1 |
|             | Melanin vs haemosiderin                                                                                                         | 1 |
| Liver       | Interpretation of orcein stain                                                                                                  | 9 |
|             | Intraductal lesions e.g. intraductal papillary neoplasm of the bile duct: dysplasia assessment and invasive foci identification | 1 |
|             | In situ lesions in the pancreas: assessment of invasion                                                                         | 1 |
|             | When high power required:<br>Diffuse type adenocarcinomas<br>Post neoadjuvant therapy cases                                     | 2 |
|             | Interpretation of Perl's stain (paler on digital)                                                                               | 1 |
|             | Identification of siderosis                                                                                                     | 1 |
| H&N         | Identification of fungi                                                                                                         | 2 |
| Skin        | Identification of interface change                                                                                              | 2 |
|             | Immunofluorescence not available digitally, so cannot fully report inflammatory cases digitally                                 | 1 |
| Gynaecology | Interpretation of immunohistochemistry (as positivity amplified)                                                                | 1 |
| Respiratory | Assessment of PD-LI expression                                                                                                  | 1 |
|             | Identification of giant cells                                                                                                   | 1 |

|  |                                              |   |
|--|----------------------------------------------|---|
|  | Identification of IgG4 positive plasma cells | 1 |
|--|----------------------------------------------|---|

Table S4: Diagnostic areas noted to be easier on the digital platform.

| Speciality            |  | Potential situations                                                                 |                         |
|-----------------------|--|--------------------------------------------------------------------------------------|-------------------------|
| General               |  | Assessment of overall anatomy                                                        | 4 (prostate, UGC, skin) |
|                       |  | Assessment of tumour distribution                                                    | 1 (prostate)            |
|                       |  | Assessment of dysplasia                                                              | 2 (HN, GI)              |
|                       |  | Identification of inflammatory cells (neutrophils, lymphocytes)                      | 3 (GI)                  |
|                       |  | Identification of lymphovascular invasion                                            | 3 (UGC, GI)             |
|                       |  | Assessment of lymph nodes                                                            | 3 (breast)              |
| Urology Germ Cell     |  | Identification of atrophy                                                            | 1                       |
|                       |  | Identification of myelomonocytic cells in stroma                                     | 1                       |
|                       |  | Identification of rete testis invasion                                               | 1                       |
|                       |  | Identification of hilar soft tissue                                                  | 1                       |
| Prostate              |  | Identification of a small focus of adenocarcinoma                                    | 6                       |
|                       |  | Identification of a benign focus                                                     | 1                       |
| Bladder/kidney/penile |  | Identification of ova                                                                | 1                       |
|                       |  | Identification of sinus vein invasion                                                | 1                       |
|                       |  | Identification of papillary adenoma                                                  | 1                       |
| Breast                |  | Interpretation of Her2 strong positive/negative, borderline weak 1+/0* or 2+/3+      | 2                       |
| Renal                 |  | Assessment of IgA positivity                                                         | 2                       |
|                       |  | Identification of amyloid on congo-red stain                                         | 2                       |
|                       |  | Identification of basement membrane ruptures on Silver stain (crisper & clearer)     | 1                       |
|                       |  | Interpretation of C4d stain (more contrast between clear background & stained areas) | 1                       |

|       |  |                                                                                               |   |
|-------|--|-----------------------------------------------------------------------------------------------|---|
|       |  | Interpretation of immunoperoxidase slides (crispier, more contrast)                           | 1 |
|       |  | Interpretation of kappa to lambda slides (crispier staining & stacking images)                | 1 |
|       |  | Identification of v1 lesions of active T cell mediated rejection                              | 1 |
|       |  | Identification of oxalate crystals                                                            | 1 |
|       |  | Identification of long spikes & CR +’ve                                                       | 1 |
|       |  | Identification of viral inclusions                                                            | 1 |
|       |  | Identification of acute glomerular thrombotic microangiopathy                                 | 1 |
| GI    |  | Identification of viral inclusions                                                            | 2 |
|       |  | Identification of candida                                                                     | 2 |
|       |  | Interpretation of MMR staining                                                                | 2 |
|       |  | Identification of pinworms                                                                    | 1 |
|       |  | Identification of florid helicobacter pylori                                                  | 1 |
|       |  | Identification of melanosis                                                                   | 1 |
| Liver |  | Identification of megamitochondria                                                            | 1 |
|       |  | Interpretation of orcein stain                                                                | 1 |
|       |  | Assessment of vascular invasion                                                               | 1 |
| H&N   |  | Interpretation of immunohistochemistry (extremely clear, including HPV in situ hybridisation) | 1 |
|       |  | Identification of perineural invasion                                                         | 1 |
|       |  | Assessment of tumour extent and infiltration                                                  | 1 |
| Skin  |  | Assessment of routine general practice specimens including basal cell carcinoma was quicker   | 1 |

Table S5: Key examples of situations where digital pathology assisted histopathologists.

|                                |                                                               | Frequency of comments |
|--------------------------------|---------------------------------------------------------------|-----------------------|
| Workflow related               | Facilitates double reporting                                  | 21                    |
|                                | Enabled remote working                                        | 2                     |
| Multidisciplinary team (MDT)   | Allows sharing cases in MDT discussion                        | 7                     |
| Interface related or technical | Taking measurements                                           | 90                    |
|                                | Low power overview                                            | 38                    |
|                                | Wider field of view                                           | 6                     |
|                                | Easily switch between H&E, special stains and report          | 13                    |
|                                | Able to link immunohistochemistry images using the slide tool | 12                    |
|                                | Able to make annotations                                      | 7                     |
|                                | Small biopsy assessment is easier and quicker                 | 3                     |
|                                | Clearer resolution including some immunostains                | 3                     |
| Education                      | Facilitates working with and teaching trainees                | 2                     |

Table S6: Issues reported to have arisen due to use of the digital interface

|                   | Disadvantages of digital interface                       | Frequency of comments |
|-------------------|----------------------------------------------------------|-----------------------|
| Interface related | Time consuming to screen large areas                     | 38                    |
|                   | Navigation around the slide more difficult               | 3                     |
| Ergonomic related | Wrist pain from examination of extra-large blocks.       | 1                     |
|                   | Looking at a screen for long periods can be very tiring. | 1                     |

Table S7: Pathologist’s diagnostic confidence

|             |                     | Digital slides                   |       | Glass slides                     |       |
|-------------|---------------------|----------------------------------|-------|----------------------------------|-------|
| Pathologist | Speciality          | Mean diagnostic confidence (0-7) | Range | Mean diagnostic confidence (0-7) | Range |
| N/A         | Across specialities | 6.8                              | 1-7   | 6.9                              | 1-7   |
| 1           | Urology Germ cell   | 5.8                              | 5-7   | 6.6                              | 6-7   |
|             | Blad/Kid/Pen        | 6                                | 4-7   | 6.4                              | 5-7   |
| 2           | Urology Germ cell   | 6.9                              | 4-7   | 6.9                              | 5-7   |
|             | Prostate            | 6.9                              | 5-7   | 6.8                              | 6-7   |
|             | Blad/Kid/Pen        | 6.7                              | 5-7   | 6.7                              | 5-7   |
| 3           | Prostate            | 6.8                              | 1-7   | 7                                | 5-7   |
|             | Blad/Kid/Pen        | 7                                | 7-7   | 7                                | 7-7   |
|             | Urology Germ cell   | 6.8                              | 6-7   | 6.9                              | 6-7   |
| 4           | Prostate            | 6.8                              | 5-7   | 7                                | 7-7   |
| 5           | Breast              | 6.7                              | 1-7   | 7                                | 5-7   |
|             | Blad/Kid/Pen        | 6.7                              | 1-7   | 7                                | 6-7   |
| 6           | Breast              | 6.8                              | 1-7   | 6.9                              | 5-7   |
| 7           | Breast              | 6.8                              | 2-7   | 7                                | 7-7   |
| 8           | Renal               | 6.6                              | 4-7   | 6.8                              | 5-7   |
| 9           | Renal               | 6.9                              | 6-7   | 6.9                              | 6-7   |
| 10          | GI                  | 6.8                              | 5-7   | 7                                | 6-7   |
|             | Liver               | 6.8                              | 5-7   | 6.9                              | 6-7   |
| 11          | GI                  | 7                                | 6-7   | 7                                | 6-7   |
| 12          | GI                  | 6.6                              | 2-7   | 6.8                              | 4-7   |
| 13          | GI                  | 7                                | 7-7   | 7                                | 7-7   |
| 14          | GI                  | 7                                | 5-7   | 7                                | 6-7   |
| 15          | H&N                 | 6.8                              | 3-7   | 7                                | 6-7   |
| 16          | Skin                | 6.9                              | 1-7   | 7                                | 6-7   |
| 17          | Skin                | 7                                | 1-7   | 7                                | 1-7   |
| 18          | Skin                | 6.4                              | 4-7   | 6.6                              | 5-7   |

|    |       |     |     |     |     |
|----|-------|-----|-----|-----|-----|
| 19 | Gynae | 7   | 6-7 | 6.9 | 1-7 |
|    | Resp  | 7   | 6-7 | 7   | 6-7 |
| 20 | Gynae | 6.9 | 5-7 | 9   | 6-7 |

Table S8: ‘Results of Stage 2 pathologist views’. Diagnostic preferences of pathologists by speciality. Pathologist confidence scores on digital reporting vs glass reporting.

| Pathologist                        | Preferred method of reporting – Digital (%) | Preferred Method of Reporting – Glass (%) | Preferred Method of Reporting - Either |
|------------------------------------|---------------------------------------------|-------------------------------------------|----------------------------------------|
| Averages across the 8 specialities | 41                                          | 8                                         | 51                                     |
| Urology Germ cell                  | 55.7                                        | 12.0                                      | 31.7                                   |
| Prostate                           | 77.0                                        | 8.3                                       | 14.7                                   |
| Blad/Kid/Pen                       | 44                                          | 9                                         | 48                                     |
| Breast                             | 61.3                                        | 6.3                                       | 32.3                                   |
| Renal                              | 7.5                                         | 7                                         | 85.5                                   |
| GI                                 | 40.6                                        | 12.6                                      | 46.6                                   |
| Liver                              | 89.0                                        | 3.0                                       | 7.0                                    |
| H&N                                | 0.0                                         | 2.0                                       | 98.0                                   |
| Skin                               | 22.3                                        | 8.0                                       | 67.3                                   |
| Gynaecology                        | 4.5                                         | 4.0                                       | 91.0                                   |
| Respiratory                        | 0.0                                         | 1.0                                       | 97.0                                   |

Table S9: Summary of all the data. A - Poor quality image. B1 -Serious error with fundamental aspects of the case. B2 – Significant error in supplementary parameter. B3 – Minor error in supplementary parameter. N/A – no clinical impact.

| Speciality<br>(path-ologists) | Time<br>taken<br>(average) | Total<br>cases<br>viewed | Cases per<br>pathologist<br>viewed<br>(average) | Cases with<br>discordances<br>(number of<br>cases) | Technical<br>deferral<br>rate (%) | Discordance<br>B1 | Discordance<br>B2               | Discordance<br>B3                | Discordance<br>N/A               | Digital<br>was<br>preferred<br>method<br>(% of<br>cases) | Glass<br>was<br>preferred<br>method<br>in this (%<br>of cases) | Either<br>digital or<br>glass<br>were the<br>preferred<br>method<br>(% of<br>cases) |
|-------------------------------|----------------------------|--------------------------|-------------------------------------------------|----------------------------------------------------|-----------------------------------|-------------------|---------------------------------|----------------------------------|----------------------------------|----------------------------------------------------------|----------------------------------------------------------------|-------------------------------------------------------------------------------------|
| Across all<br>specialities    | 11.9<br>months             | 3777<br>cases            | 135 cases                                       | 49 cases<br><br>1.3% of<br>cases                   | 2.6%                              | 0 cases           | 3 cases<br><br>0.1% of<br>cases | 16 cases<br><br>0.4% of<br>cases | 30 cases<br><br>0.8% of<br>cases | 41%                                                      | 8%                                                             | 51%                                                                                 |
| Urology germ<br>cell          | 12.8<br>months             | 149<br>cases             | 50 cases                                        | 1 case                                             | 2%                                | 0 cases           | 0 cases                         | 1 case                           | 0 cases                          | 56%                                                      | 12%                                                            | 32%                                                                                 |
| Prostate                      | 8 months                   | 173<br>cases             | 58 cases                                        | 8 cases                                            | 2.9%                              | 0 cases           | 0 cases                         | 3 cases                          | 5 cases                          | 77%                                                      | 8%                                                             | 15%                                                                                 |

|                  |             |            |           |          |      |         |         |         |         |      |      |       |
|------------------|-------------|------------|-----------|----------|------|---------|---------|---------|---------|------|------|-------|
| Blad/Kid/Pen     | 8.5 months  | 244 cases  | 61 cases  | 13 cases | 1.6% | 0 cases | 2 cases | 5 cases | 6 cases | 44%  | 9%   | 48%   |
| Breast           | 6.8 Months  | 660 cases  | 220 cases | 10 cases | 3.5% | 0 cases | 0 cases | 2 cases | 8 cases | 61.3 | 6.3  | 32.3  |
| Renal            | 15.4 months | 138 cases  | 69 cases  | 2 cases  | 0%   | 0 cases | 0 cases | 1 case  | 1 case  | 7.5% | 7%   | 85.5% |
| Gastrointestinal | 14 months   | 1188 cases | 238 cases | 9 cases  | 2.7% | 0 cases | 1 case  | 1 case  | 6 cases | 40.6 | 12.6 | 46.6  |
| Liver            | 18.9 months | 99 cases   | 99 cases  | 1 case   | 15%  | 0 cases | 0 cases | 0 cases | 1 case  | 89   | 3    | 7     |
| Gynaecology      | 16 Months   | 180 cases  | 90 cases  | 0 cases  | 0.6% | 0 cases | 0 cases | 0 cases | 0 cases | 4.5  | 4    | 91    |
| H&N              | 2.4 months  | 87 cases   | 87 cases  | 0 cases  | 5.8% | 0 cases | 0 cases | 0 cases | 0 cases | 0    | 2    | 98    |
| Skin             | 14.6 months | 726 cases  | 242 cases | 6 cases  | 1.2% | 0 cases | 0 cases | 3 cases | 2 cases | 22.3 | 8    | 67.3  |

|             |            |           |           |         |    |         |         |         |        |   |   |    |
|-------------|------------|-----------|-----------|---------|----|---------|---------|---------|--------|---|---|----|
| Respiratory | 6.2 months | 133 cases | 133 cases | 0 cases | 0% | 0 cases | 0 cases | 0 cases | 1 case | 0 | 1 | 97 |
|-------------|------------|-----------|-----------|---------|----|---------|---------|---------|--------|---|---|----|

Figure S1: Cases with discordances (% of total cases)

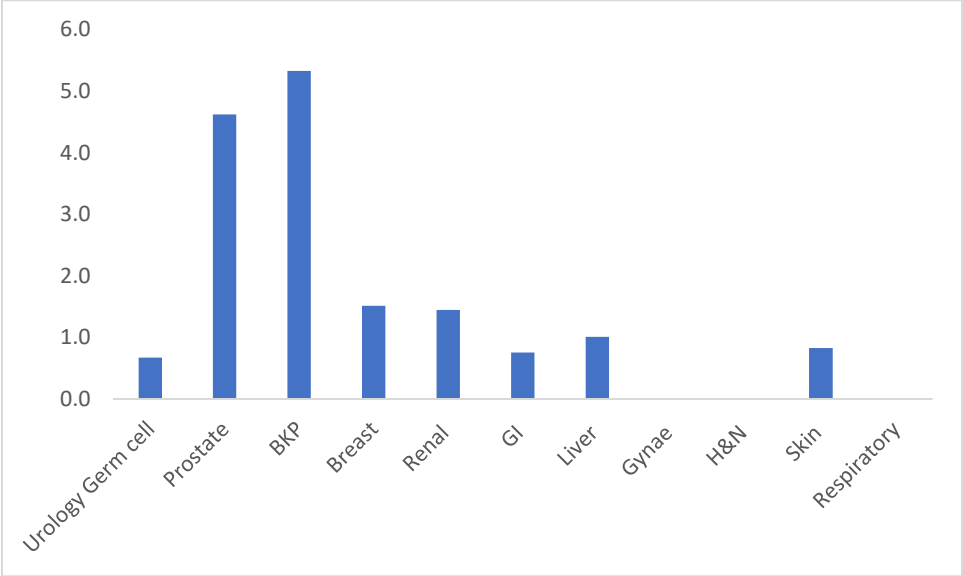

Supplement: s1 [file s1]
